# Supplementary material for: Clinical Validation of a Deep Learning Model forSegmenting and Quantifying Intracranial andVentricular Volumes on Computed Tomography
Source: Research Square preprint supplement (doi:10.21203/rs.3.rs-4947326/v1), 2024-10-03
Supplement: Supplementary file 1 [file a8b7ac6647a9e411db56a56e.pdf]

# Clinical Validation of a Deep Learning Model for Segmenting and Quantifying Intracranial and Ventricular Volumes on Computed Tomography

Bruna Garbes Gonçalves Pinto<sup>1\*†</sup>, Tayran Milá Mendes Olegário<sup>1†</sup>,  
Pedro Vinicius Alves Silva<sup>1</sup>, Gabriel Monteiro Ferracioli<sup>1</sup>,  
Artur José Marques Paulo<sup>1</sup>, Klaus Schumacher<sup>1</sup>,  
Mateus Trinconi Cunha<sup>1, 2</sup>, Henrique Min Ho Lee<sup>1</sup>,  
Mariana Athaniel Silva Rodrigues<sup>1</sup>, Felipe Campos Kitamura<sup>3</sup>,  
Joselisa Peres Queiroz de Paiva<sup>1</sup>, Rafael Maffei Loureiro<sup>1</sup>

<sup>1\*</sup>Image Department, Hospital Israelita Albert Einstein, São Paulo, Brazil.

<sup>2</sup>Sunnybrook Health Sciences Centre, University of Toronto, Toronto, Canada.

<sup>3\*</sup>Departament of Diagnostic Imaging, Universidade Federal de São Paulo, São Paulo, Brazil.

\*Corresponding author(s). E-mail(s): [bruna.goncalves@einstein.br](mailto:bruna.goncalves@einstein.br);

<sup>†</sup>These authors contributed equally to this work.

## 1 Supplementary Material

The stages of generating the pre-segmentation masks of the intracranial volume include:

1. **Image size verification:** If the image has less than 500 slices, it is resized to a new image with 500 slices.
2. **Application of Gaussian filter:** A Gaussian filter with a parameter  $\sigma = 1$  is applied to the image to reduce noise, uniformizing some image regions and thus facilitating the segmentation process.
3. **Thresholding application:** A mask is generated by applying a threshold value to the image. The mask includes all voxels with values between -15 and 50 Hounsfield units.

4. **Erosion operation application:** An erosion operation is applied to the resulting mask from the previous step to "erode" the sides of the mask and thus disconnect the various structures present in the mask.
5. **Selection of the largest connected region:** then the largest connected region of the mask is selected. This largest connected region is expected to correspond to part of the intracranial volume region.
6. **Dilation operation application:** A dilation operation is then applied to the largest connected region to "compensate" for previously applied erosion operation. It is expected that after applying this operation, only the intracranial volume region will be obtained. This dilation will only affect voxels with values between -50HU and 150HU.
7. **Cutting the bottom region of the mask:** Finally, a heuristic is applied that traverses the image from bottom to top and calculates the number of connected regions in the axial slices. If only one connected region appears in the slice, it is excluded; the heuristic is terminated if more than one connected region appears.

**Table 1** Kruskal-Wallis and Effect Sizes for Volumes by Patient Sex

|                                    | P-Value | $\eta^2$ | Magnitude |
|------------------------------------|---------|----------|-----------|
| Intracranial Volume - Ground truth | <0.001  | 0.38     | Large     |
| Intracranial Volume - DeepCTE3D    | <0.001  | 0.36     | Large     |
| Ventricular Volume - Ground truth  | <0.001  | 0.02     | Small     |
| Ventricular Volume - DeepCTE3D     | 0.02    | 0.01     | Small     |

Distribution of intracranial and ventricular volumes – GT

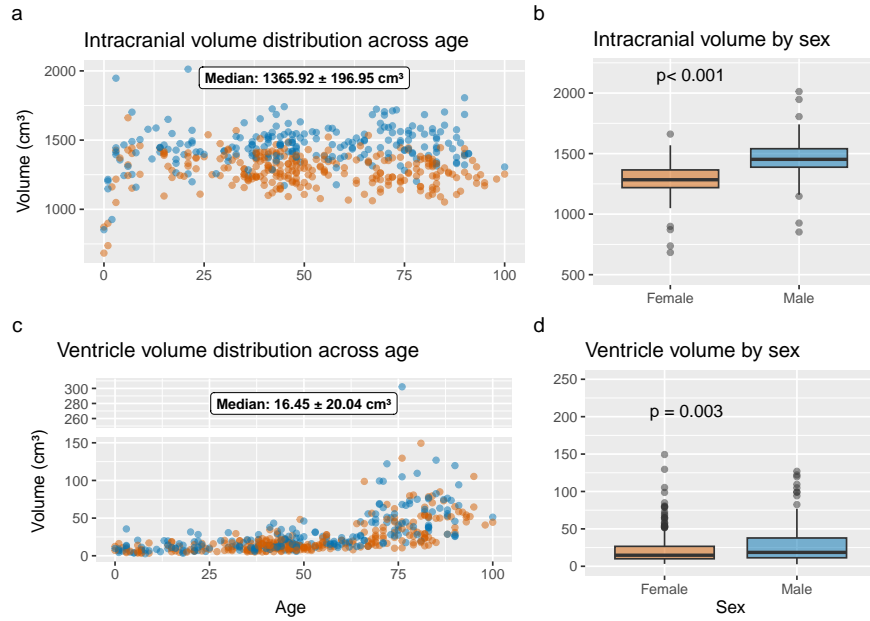

**Fig. 1** Volume distributions of ground-truth segmentations. a) Intracranial volume by patient age. b) Intracranial volume by patient sex. c) Ventricular volume by patient age. d) Ventricular volumes by patient sex.

**Table 2** Kruskal-Wallis and Effect Sizes for Volumes by Equipment

|                                 | P-Value | $\eta^2$ | Magnitude |
|---------------------------------|---------|----------|-----------|
| Intracranial Volume - GT        | 0.20    | < 0.01   | Small     |
| Intracranial Volume - DeepCTE3D | 0.25    | < 0.01   | Small     |
| Ventricular Volume - GT         | < 0.001 | 0.03     | Small     |
| Ventricular Volume - DeepCTE3D  | < 0.001 | 0.05     | Small     |

Distribution of intracranial and ventricular volumes by scanners – GT

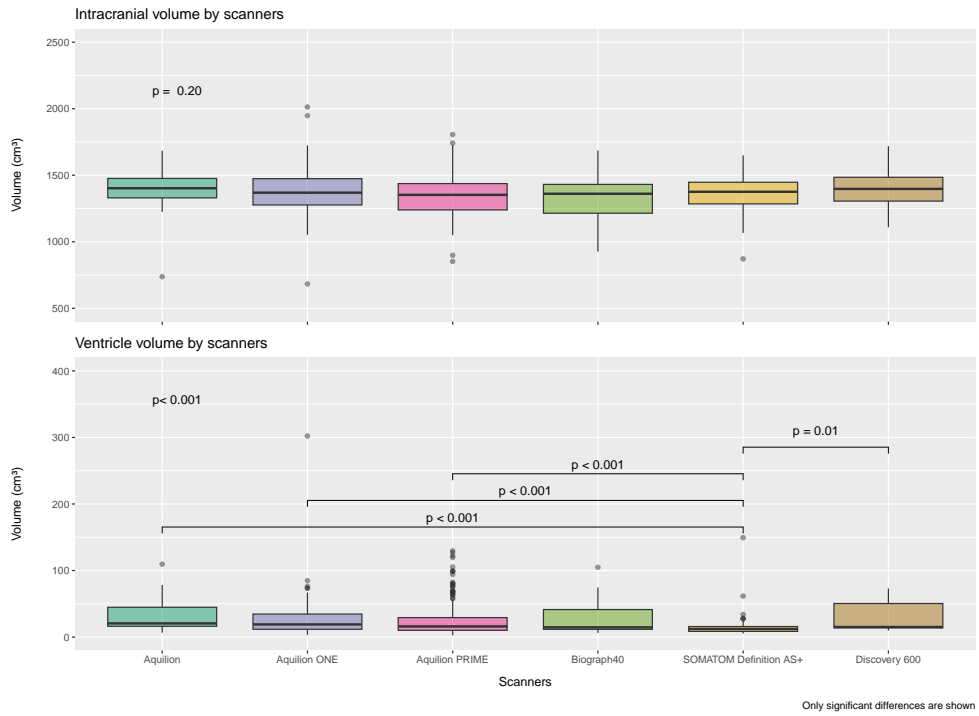

**Fig. 2** Intracranial and ventricular volumes by scanner model - Ground Truth.

# Distribution of intracranial and ventricular volumes – DeepCTE3D

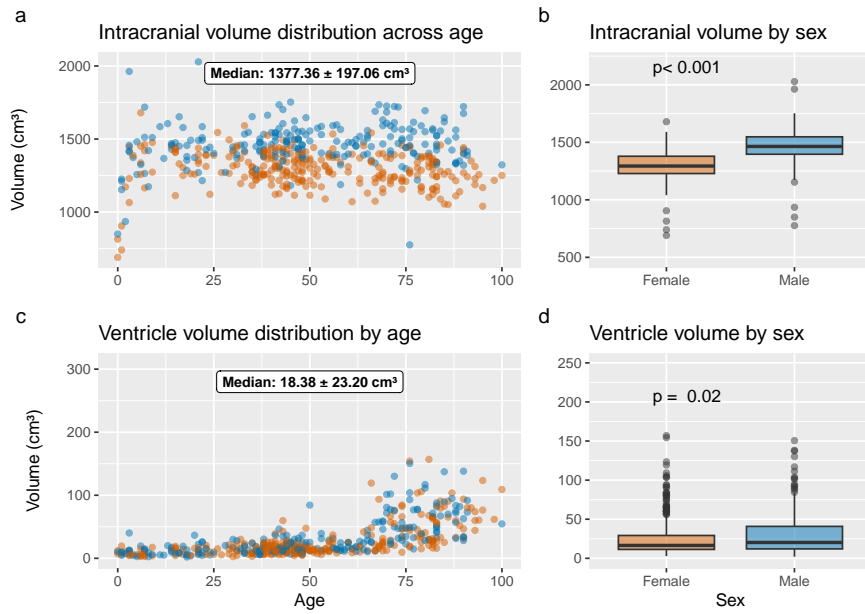

**Fig. 3** Volume distributions of DeepCTE3D segmentations. a) Intracranial volume by patient age. b) Intracranial volume by patient sex. c) Ventricular volume by patient age. d) Ventricular volume by patient sex.

Distribution of intracranial and ventricular volumes by scanners – DeepCTE3D

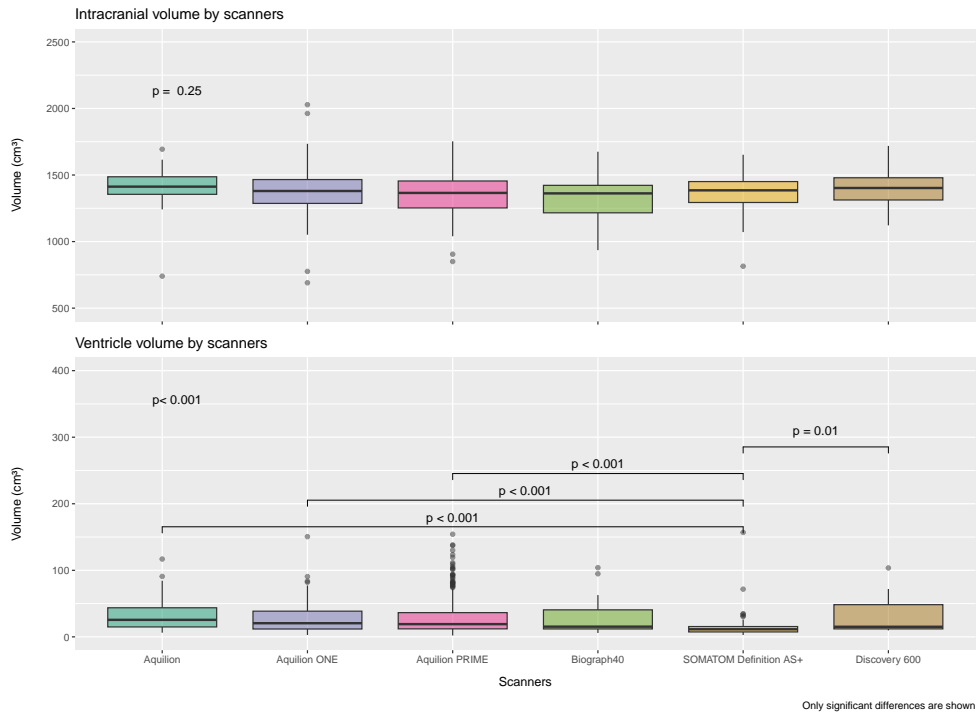

**Fig. 4** Volumes by scanner model - DeepCTE3D.

**Table 3** Kruskal-Wallis and Effect Sizes for Relative Differences by Patient Sex and Scanners

| Structure                  | Group       | P-Value | $\eta^2$ | Magnitude |
|----------------------------|-------------|---------|----------|-----------|
| Intracranial volumes       | Patient Sex | <0.001  | 0.03     | Small     |
| Intracranial volumes       | Scanner     | <0.001  | 0.12     | Moderate  |
| Lateral ventricles volumes | Patient Sex | 0.03    | 0.02     | Small     |
| Lateral ventricle volumes  | Scanner     | <0.001  | 0.23     | Large     |

**Table 4** Effect Sizes for Intracranial Relative Differences Between Scanner Type Pairwise Comparisons

| Scanner A              | Scanner B              | P-Value | r    | Magnitude |
|------------------------|------------------------|---------|------|-----------|
| Aquilion               | Biograph40             | <0.001  | 0.49 | Moderate  |
| Aquilion               | SOMATOM Definition AS+ | <0.001  | 0.35 | Moderate  |
| Aquilion               | Discovery 600          | <0.001  | 0.55 | Large     |
| Aquilion ONE           | Biograph40             | <0.001  | 0.35 | Moderate  |
| Aquilion ONE           | SOMATOM Definition AS+ | <0.001  | 0.37 | Moderate  |
| Aquilion ONE           | Discovery 600          | <0.001  | 0.33 | Moderate  |
| Aquilion PRIME         | Biograph40             | <0.001  | 0.28 | Small     |
| Aquilion PRIME         | SOMATOM Definition AS+ | <0.001  | 0.31 | Moderate  |
| Aquilion PRIME         | Discovery 600          | <0.001  | 0.27 | Small     |
| SOMATOM Definition AS+ | Discovery 600          | 0.049   | 0.24 | Small     |

**Table 5** Effect Sizes for Lateral Ventricle Relative Differences Between Scanner Type Pairwise Comparisons.

| Scanner A              | Scanner B              | P-Value | r    | Magnitude |
|------------------------|------------------------|---------|------|-----------|
| Aquilion               | Aquilion PRIME         | 0.02    | 0.15 | Small     |
| Aquilion               | SOMATOM Definition AS+ | <0.001  | 0.44 | Moderate  |
| Aquilion ONE           | Aquilion PRIME         | <0.001  | 0.41 | Moderate  |
| Aquilion ONE           | SOMATOM Definition AS+ | <0.001  | 0.29 | Small     |
| Aquilion PRIME         | Biograph40             | <0.001  | 0.23 | Small     |
| Aquilion PRIME         | SOMATOM Definition AS+ | <0.001  | 0.50 | Large     |
| Aquilion PRIME         | Discovery 600          | = 0.002 | 0.19 | Small     |
| SOMATOM Definition AS+ | Discovery 600          | 0.04    | 0.26 | Small     |

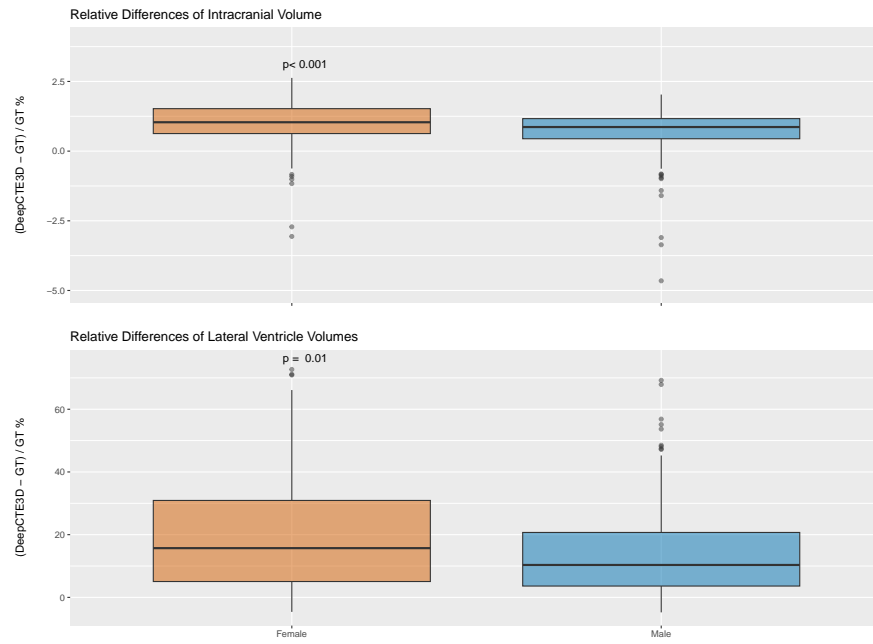

**Fig. 5** Relative differences by patient sex a) Relative differences for intracranial volume b) Relative Difference for lateral ventricle volumes.



# Relative Differences by Scanners

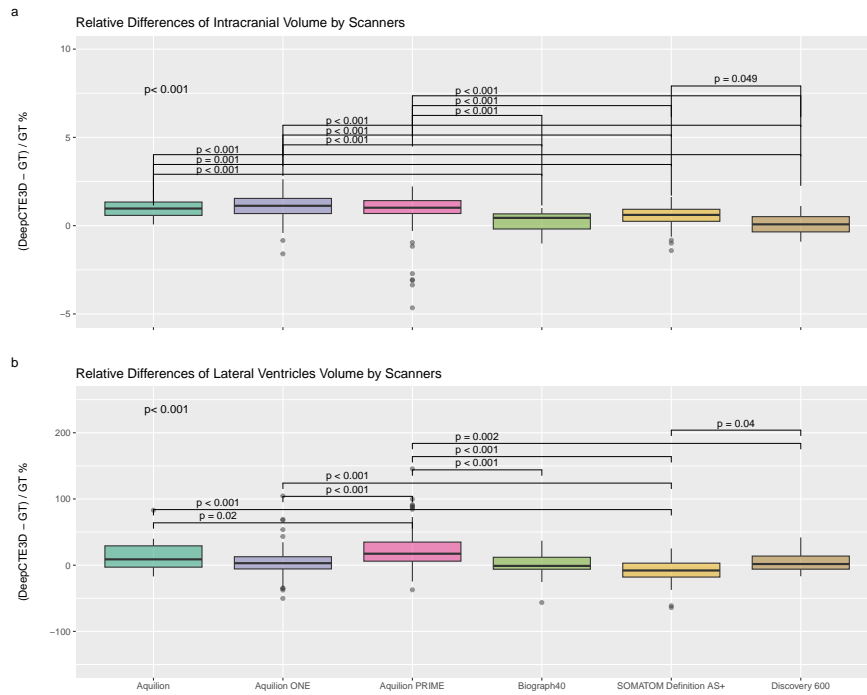

**Fig. 6** Relative differences by scanners a) Relative differences for intracranial volume b) Relative Difference for lateral ventricle volumes.

**Table 6** Kruskal-Wallis and Effect Sizes for Metrics by Patient Sex

|                        | P-Value | $\eta^2$ | Magnitude |
|------------------------|---------|----------|-----------|
| Intracranial Dice      | 0.03    | 0.01     | Small     |
| Intracranial Hausdorff | 0.15    | <0.01    | Small     |
| Ventricular Dice       | <0.001  | 0.02     | Small     |
| Ventricular Hausdorff  | 0.82    | <0.01    | Small     |

Distribution of metrics by scanners – Intracranial volume

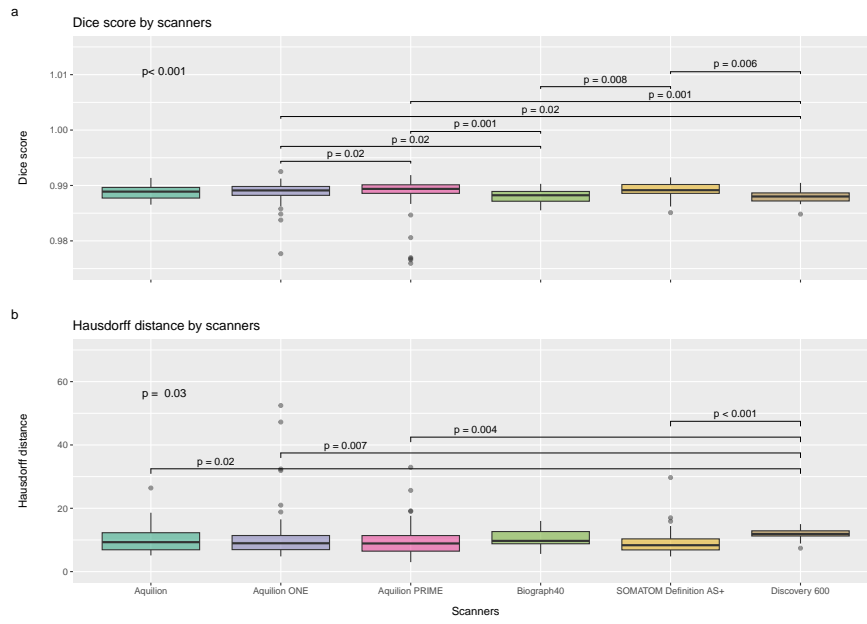

**Fig. 7** Dice and Hausdorff distributions of intracranial segmentation across scanner models. a) Dice Score across models. b) Hausdorff Distance across models

**Table 7** Kruskal-Wallis and Effect Sizes for Metrics by Equipment

|                        | P-Value | $\eta^2$ | Magnitude |
|------------------------|---------|----------|-----------|
| Intracranial Dice      | < 0.001 | 0.04     | Small     |
| Intracranial Hausdorff | 0.03    | 0.02     | Small     |
| Ventricular Dice       | <0.001  | 0.04     | Small     |
| Ventricular Hausdorff  | 0.51    | <0.01    | Small     |

Distribution of metrics by scanners – Lateral ventricles

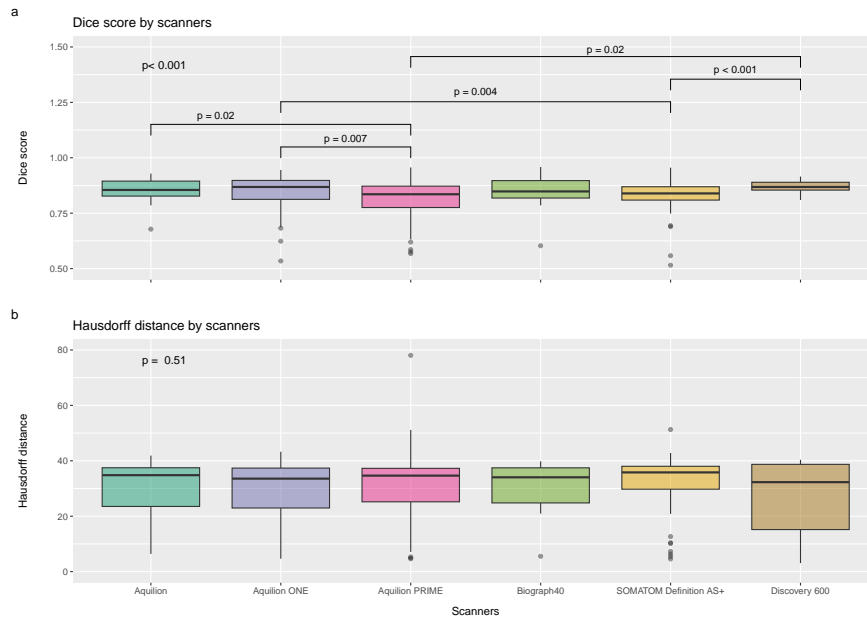

**Fig. 8** Dice and Hausdorff distributions of ventricular segmentation across scanner models. a) Dice Score across equipment. b) Hausdorff Distance across scanner models

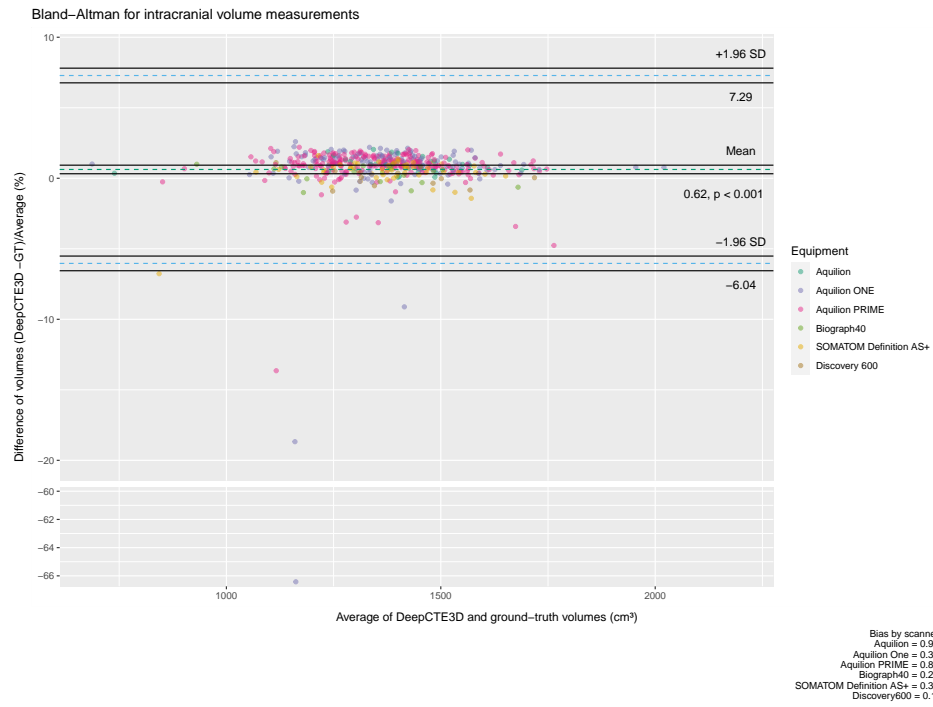

**Fig. 9** Bland-Altman plot assessing agreement between DeepCTE3D-generated and ground-truth intracranial volumes colored by scanner type.

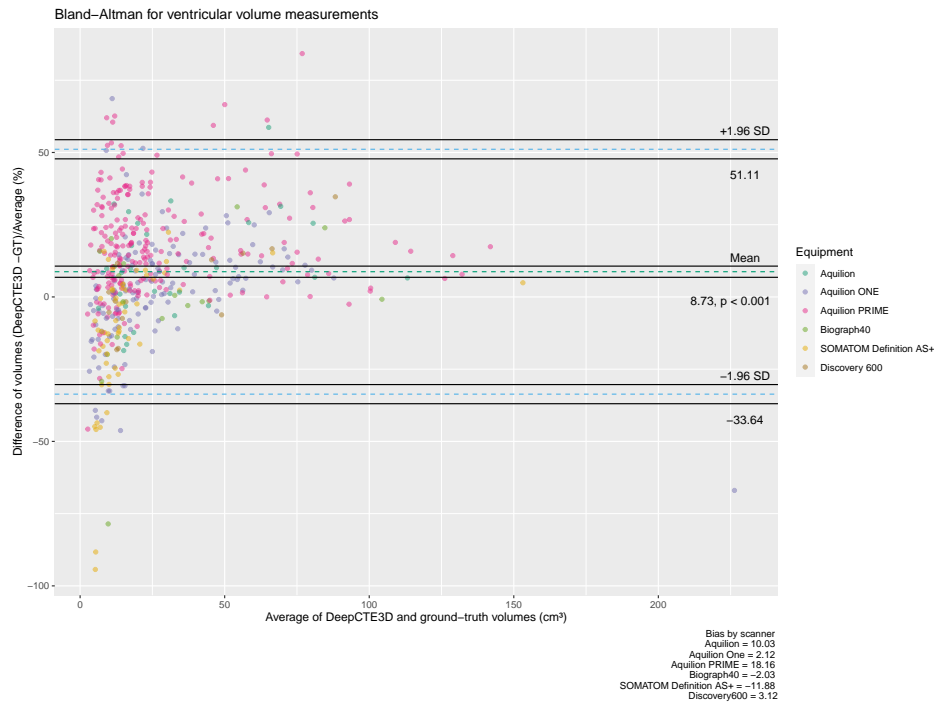

**Fig. 10** Bland-Altman plot assessing agreement between DeepCTE3D-generated and ground-truth ventricular volumes colored by scanner type.

**Table 8** Bias and Effect Size by Equipment for Intracranial Volumes.

| Scanner A              | Scanner B              | P-Value | r    | Magnitude |
|------------------------|------------------------|---------|------|-----------|
| Aquilion               | Biograph40             | < 0.001 | 0.49 | Moderate  |
| Aquilion               | SOMATOM Definition AS+ | 0.001   | 0.35 | Moderate  |
| Aquilion               | Discovery 600          | < 0.001 | 0.55 | Large     |
| Aquilion ONE           | Biograph40             | < 0.001 | 0.35 | Moderate  |
| Aquilion ONE           | SOMATOM Definition AS+ | < 0.001 | 0.37 | Moderate  |
| Aquilion ONE           | Discovery 600          | < 0.001 | 0.33 | Moderate  |
| Aquilion PRIME         | Biograph40             | < 0.001 | 0.28 | Small     |
| Aquilion PRIME         | SOMATOM Definition AS+ | < 0.001 | 0.31 | Moderate  |
| Aquilion PRIME         | Discovery 600          | < 0.001 | 0.27 | Small     |
| SOMATOM Definition AS+ | Discovery 600          | 0.049   | 0.24 | Small     |

**Table 9** Bias and Effect Size by Equipment for Lateral Ventricles Volumes.

| Scanner A              | Scanner B              | P-Value | r    | Magnitude |
|------------------------|------------------------|---------|------|-----------|
| Aquilion               | Aquilion PRIME         | 0.02    | 0.15 | Small     |
| Aquilion               | SOMATOM Definition AS+ | < 0.001 | 0.44 | Moderate  |
| Aquilion ONE           | Aquilion PRIME         | < 0.001 | 0.41 | Moderate  |
| Aquilion ONE           | SOMATOM Definition AS+ | < 0.001 | 0.29 | Small     |
| Aquilion PRIME         | Biograph40             | < 0.001 | 0.23 | Small     |
| Aquilion PRIME         | SOMATOM Definition AS+ | < 0.001 | 0.50 | Large     |
| Aquilion PRIME         | Discovery 600          | 0.002   | 0.19 | Small     |
| SOMATOM Definition AS+ | Discovery 600          | 0.04    | 0.26 | Small     |



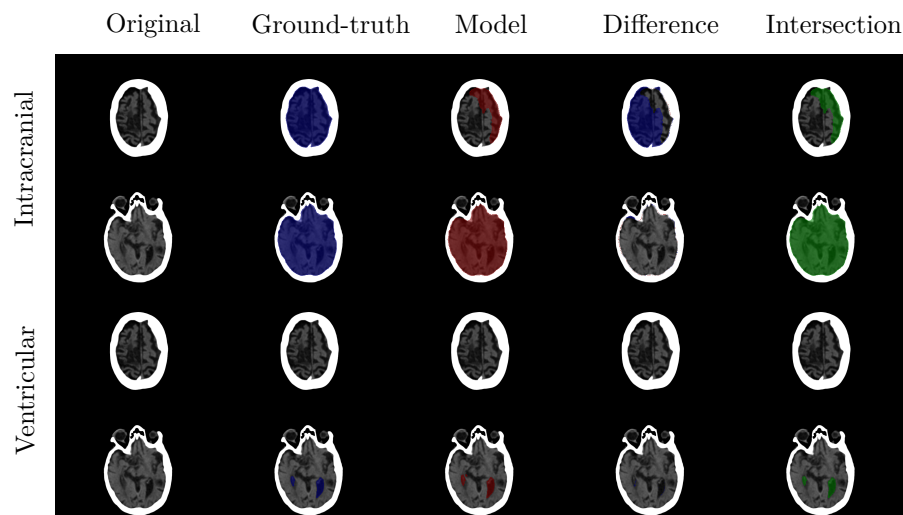

**Fig. 11** Example 1 of poor model performance: This case exhibits an angulated visualization of the head, a large frontoparietal encephalomalacia on the right side, and asymmetric ventricular ectasia. Segmentation errors occur predominantly in the high convexity on the same side as the encephalomalacia but also extend into regions with normal brain parenchyma. In the ventricular areas, the model overflowed the boundaries of the lateral ventricles.

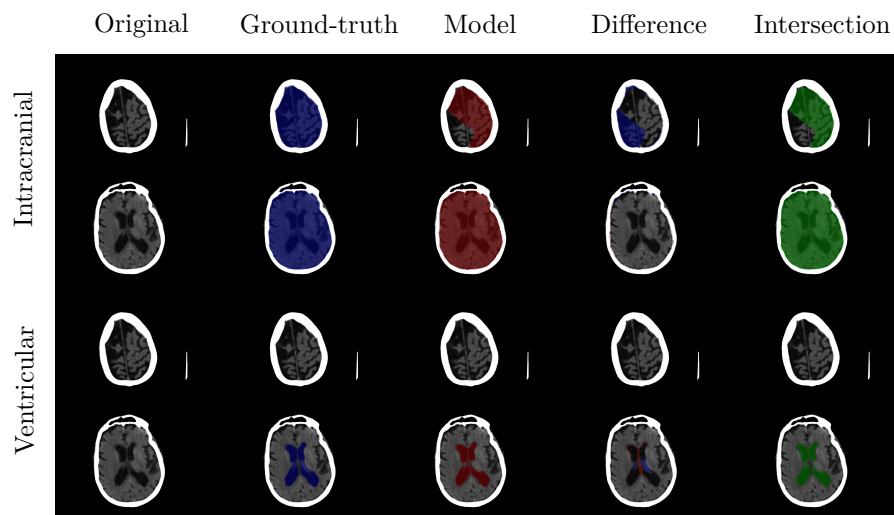

**Fig. 12** Example 2 of poor model performance: This case exhibits a focal frontoparietal subarachnoid enlargement on the right side, moderate ventricular ectasia, and a mild degree of parenchymal atrophy. Segmentation errors occur predominantly in the high convexity on the same side as the enlargement but also extend into regions with normal brain parenchyma.

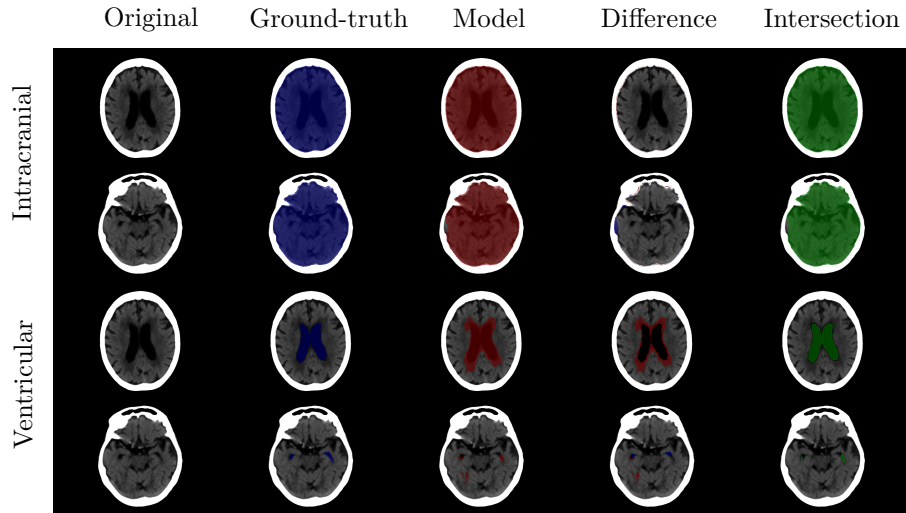

**Fig. 13** Example 3 of poor model performance: This case exhibits a greater degree of white matter disease, a moderate degree of parenchymal atrophy with proportional ventricular ectasia, and a small thalamic lacune (not shown). Segmentation errors predominantly occur in the ventricular spaces, overflowing the boundaries, with some subarachnoid spaces also being misclassified (on the right side). The lacune was erroneously segmented as part of the ventricular space.
